# Supplementary material
Source: PubMed Central journal article supplement (PMC3486042)

**Figure S1. Transcription of *lic12031* is not significantly different in *katE* mutant *Leptospira* compared to wild-type *Leptospira*.** Quantitative PCR was performed on cDNA from *katE* mutant and wild-type *Leptospira* to compare the expression level of *lic12031*. Gene *flaB1* was used to normalize fluorescence values between mutants and the respective wild-type *Leptospira*. The Student's *t* test was used to compare normalised fluorescence values between *katE* mutant and wild-type *Leptospira*; no significant difference was found.

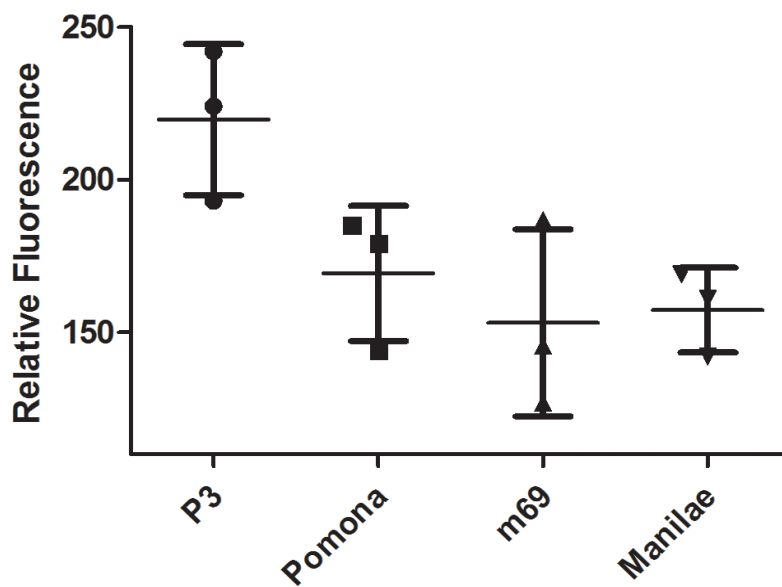

Supplement: IAI.00466-12_zii999099867so1.pdf [file IAI.00466-12_zii999099867so1.pdf]
